# Supplementary material for: Studies on sand fly fauna and ecological analysis of Phlebotomus orientalis in the highland and lowland foci of kala-azar in northwestern Ethiopia
Source: PubMed Central journal article supplement (PMC5383282; doi:10.1371/journal.pone.0175308), 2017-04-06
Supplement: pone.0175308.s001.pdf [file pone.0175308.s001.pdf]

| Month | desnity of P. orientalis collected using LTs in Libo | density of P. orientalis collected Using LTs in Metema | density of P. orientalis collected using STs in Lbo | density of P. orientalis collected in Metam using STs |
|-------|------------------------------------------------------|--------------------------------------------------------|-----------------------------------------------------|-------------------------------------------------------|
| 1     | 1.63                                                 | 0.06                                                   | 0.09                                                | 0                                                     |
| 1     | 17.76                                                | 2.4                                                    | 0.78                                                | 0.78                                                  |
| 1     | 0                                                    | 4.56                                                   | 0                                                   | 0                                                     |
| 2     | 2.07                                                 | 0.17                                                   | 0.05                                                | 0.03                                                  |
| 2     | 3.8                                                  | 3.27                                                   | 0.25                                                | 0.19                                                  |
| 2     | 0                                                    | 2.11                                                   | 0                                                   | 0.43                                                  |
| 3     | 3.86                                                 | 0.65                                                   | 0.28                                                | 0.25                                                  |
| 3     | 21.27                                                | 6.04                                                   | 0.51                                                | 0.87                                                  |
| 3     | 0                                                    | 3.17                                                   | 0                                                   | 0.09                                                  |
| 4     | 5.33                                                 | 3                                                      | 0.26                                                | 0.24                                                  |
| 4     | 53.85                                                | 18.5                                                   | 0.51                                                | 0.5                                                   |
| 4     | 0                                                    | 9.25                                                   | 0                                                   | 0.17                                                  |
| 5     | 2.88                                                 | 0.8                                                    | 0.09                                                | 0.11                                                  |
| 5     | 0                                                    | 19.23                                                  | 1.54                                                | 0.18                                                  |
| 5     | 10.1                                                 | 1.5                                                    | 0                                                   | 0                                                     |
| 6     | 2.02                                                 | 4.3                                                    | 0.06                                                | 0.39                                                  |
| 6     | 3.39                                                 | 37.79                                                  | 0.11                                                | 1.12                                                  |
| 6     | 0                                                    | 7.5                                                    | 0                                                   | 0.25                                                  |
| 7     | 0.06                                                 | 0                                                      | 0                                                   | 0.01                                                  |
| 7     | 1.83                                                 | 3.58                                                   | 0                                                   | 0.27                                                  |
| 7     | 0                                                    | 0.92                                                   | 0                                                   | 0.12                                                  |
| 8     | 0                                                    | 0                                                      | 0                                                   | 0                                                     |
| 8     | 0                                                    | 0.25                                                   | 0                                                   | 0.01                                                  |
| 8     | 0                                                    | 0                                                      | 0                                                   | 0                                                     |
| 9     | 0                                                    | 0                                                      | 0                                                   | 0                                                     |
| 9     | 0                                                    | 0                                                      | 0                                                   | 0                                                     |
| 9     | 0                                                    | 0                                                      | 0                                                   | 0                                                     |
| 10    | 0.22                                                 | 0.75                                                   | 0.01                                                | 0                                                     |
| 10    | 1.21                                                 | 0                                                      | 0                                                   | 0                                                     |
| 10    | 0.06                                                 | 0                                                      | 0                                                   | 0                                                     |
| 11    | 0.22                                                 | 0                                                      | 0                                                   | 0                                                     |
| 11    | 0.85                                                 | 0                                                      | 0.05                                                | 0.19                                                  |
| 11    | 0                                                    | 0                                                      | 0                                                   | 0.03                                                  |
| 12    | 0.12                                                 | 0.04                                                   | 0.01                                                | 0.14                                                  |
| 12    | 1.23                                                 | 0.3                                                    | 0.26                                                | 0.21                                                  |

|    |   |      |   |      |
|----|---|------|---|------|
| 12 | 0 | 0.75 | 0 | 0.04 |
|----|---|------|---|------|

N.B. 1-12= January-December
