# Supplementary material for: Studies on sand fly fauna and ecological analysis of Phlebotomus orientalis in the highland and lowland foci of kala-azar in northwestern Ethiopia
Source: PubMed Central journal article supplement (PMC5383282; doi:10.1371/journal.pone.0175308), 2017-04-06
Supplement: pone.0175308.s002.pdf [file pone.0175308.s002.pdf]

| Habitat | Male density Libo | Female Density Libo | Total density Libo | Male density Metema | Female density Metema | Total density Metema |
|---------|-------------------|---------------------|--------------------|---------------------|-----------------------|----------------------|
| 1       | 0.13              | 0                   | 0.13               | 0                   | 0                     | 0                    |
| 1       | 0.04              | 0                   | 0.04               | 0.06                | 0.01                  | 0.07                 |
| 1       | 0                 | 0                   | 0                  | 0.1                 | 0.01                  | 0.11                 |
| 1       | 0                 | 0                   | 0                  | 0.28                | 0.01                  | 0.28                 |
| 1       | 0                 | 0                   | 0                  | 0.2                 | 0                     | 0.2                  |
| 1       | 0                 | 0                   | 0                  | 0.25                | 0.01                  | 0.26                 |
| 1       | 0.02              | 0                   | 0.02               | 0.16                | 0.02                  | 0.18                 |
| 1       | 0.05              | 0.01                | 0.06               | 0.08                | 0.01                  | 0.08                 |
| 1       | 0.22              | 0.01                | 0.23               | 0.21                | 0.01                  | 0.22                 |
| 1       | 0.1               | 0.01                | 0.11               | 0.01                | 0                     | 0.01                 |
| 1       | 0.34              | 0.01                | 0.35               | 0                   | 0                     | 0                    |
| 1       | 0.17              | 0                   | 0.18               | 0                   | 0                     | 0                    |
| 2       | 0.16              | 0.01                | 0.17               | 0                   | 0                     | 0                    |
| 2       | 0.02              | 0                   | 0.02               | 0                   | 0                     | 0                    |
| 2       | 0                 | 0                   | 0                  | 0                   | 0                     | 0.01                 |
| 2       | 0                 | 0                   | 0                  | 0.09                | 0                     | 0.09                 |
| 2       | 0                 | 0                   | 0                  | 0.02                | 0.02                  | 0.04                 |
| 2       | 0                 | 0                   | 0.01               | 0.24                | 0.02                  | 0.26                 |
| 2       | 0                 | 0                   | 0                  | 0.1                 | 0                     | 0.1                  |
| 2       | 0                 | 0                   | 0                  | 0.03                | 0.01                  | 0.04                 |
| 2       | 0.01              | 0                   | 0.01               | 0.38                | 0.01                  | 0.39                 |
| 2       | 0.01              | 0                   | 0.01               | 0.1                 | 0.01                  | 0.11                 |
| 2       | 0.01              | 0                   | 0.01               | 0                   | 0                     | 0                    |
| 2       | 0.08              | 0                   | 0.08               | 0                   | 0                     | 0                    |
| 3       | 0                 | 0                   | 0                  | 0                   | 0                     | 0                    |
| 3       | 0.01              | 0                   | 0.01               | 0                   | 0                     | 0                    |
| 3       | 0                 | 0                   | 0                  | 0                   | 0                     | 0                    |
| 3       | 0                 | 0                   | 0                  | 0                   | 0                     | 0                    |
| 3       | 0                 | 0                   | 0                  | 0                   | 0                     | 0                    |
| 3       | 0                 | 0                   | 0                  | 0                   | 0                     | 0                    |
| 3       | 0                 | 0                   | 0                  | 0.02                | 0                     | 0.02                 |
| 3       | 0                 | 0                   | 0                  | 0.01                | 0                     | 0.01                 |
| 3       | 0                 | 0                   | 0                  | 0.01                | 0                     | 0.01                 |
| 3       | 0                 | 0                   | 0                  | 0.02                | 0                     | 0.02                 |
| 3       | 0                 | 0                   | 0                  | 0                   | 0                     | 0                    |
| 3       | 0                 | 0                   | 0                  | 0                   | 0                     | 0                    |

N.B. 1= farm field;2= mixed forest; 3= indoor
