# Supplementary material for: Studies on sand fly fauna and ecological analysis of Phlebotomus orientalis in the highland and lowland foci of kala-azar in northwestern Ethiopia
Source: PubMed Central journal article supplement (PMC5383282; doi:10.1371/journal.pone.0175308), 2017-04-06
Supplement: pone.0175308.s003.pdf [file pone.0175308.s003.pdf]

| Habitat | Male density in Metema | Female density Metema | Total density Metema | Male density Libo | Female density Libo | Total density Libo |
|---------|------------------------|-----------------------|----------------------|-------------------|---------------------|--------------------|
| 1       | 0.38                   | 0                     | 0.38                 | 1.53              | 1.84                | 3.38               |
| 1       | 0                      | 0                     | 0                    | 0.37              | 0.42                | 0.79               |
| 1       | 0.2                    | 0.06                  | 0.27                 | 0.06              | 0.11                | 0.17               |
| 1       | 1.54                   | 0.37                  | 1.91                 | 0                 | 0                   | 0                  |
| 1       | 1.04                   | 0.65                  | 1.69                 | 0                 | 0                   | 0                  |
| 1       | 1.44                   | 0.86                  | 2.3                  | 0.1               | 0.33                | 0.43               |
| 1       | 1.75                   | 1.17                  | 2.92                 | 0.05              | 0.06                | 0.11               |
| 1       | 0.2                    | 1                     | 1.2                  | 0.1               | 0.06                | 0.16               |
| 1       | 1                      | 0.83                  | 1.83                 | 0.89              | 1.07                | 1.96               |
| 1       | 0.14                   | 0.08                  | 0.22                 | 0.51              | 0.24                | 0.76               |
| 1       | 0.06                   | 0                     | 0.06                 | 1.23              | 1.31                | 2.54               |
| 1       | 0                      | 0                     | 0                    | 4.88              | 2.82                | 7.7                |
| 2       | 0                      | 0                     | 0                    | 0.25              | 0                   | 0.25               |
| 2       | 0                      | 0                     | 0                    | 0.1               | 0.08                | 0.17               |
| 2       | 0                      | 0                     | 0                    | 0.05              | 0.05                | 0.1                |
| 2       | 0.04                   | 0                     | 0.04                 | 0                 | 0                   | 0                  |
| 2       | 0.21                   | 0.24                  | 0.45                 | 0                 | 0                   | 0                  |
| 2       | 0.58                   | 0.2                   | 0.78                 | 0                 | 0.05                | 0.05               |
| 2       | 3.02                   | 1.93                  | 4.95                 | 0.08              | 0.04                | 0.12               |
| 2       | 6.64                   | 1.82                  | 8.46                 | 0.07              | 0.06                | 0.13               |
| 2       | 10.17                  | 9.27                  | 19.44                | 0.13              | 0.23                | 0.37               |
| 2       | 0.33                   | 0.17                  | 0.5                  | 0.12              | 0.07                | 0.19               |
| 2       | 0                      | 0.03                  | 0.03                 | 0.12              | 0.05                | 0.17               |
| 2       | 0                      | 0                     | 0                    | 0.14              | 0.06                | 0.21               |
| 3       | 0                      | 0                     | 0                    | 0.44              | 0.06                | 0.5                |
| 3       | 0                      | 0                     | 0                    | 0.72              | 0.36                | 1.08               |
| 3       | 0                      | 0.02                  | 0.02                 | 0                 | 0.02                | 0.02               |
| 3       | 0.04                   | 0.02                  | 0.07                 | 0                 | 0                   | 0                  |
| 3       | 0.02                   | 0.02                  | 0.03                 | 0                 | 0                   | 0                  |
| 3       | 0.25                   | 0.27                  | 0.52                 | 0                 | 0.03                | 0.03               |
| 3       | 1.94                   | 1.07                  | 3.01                 | 0.01              | 0.01                | 0.02               |
| 3       | 2.34                   | 3.03                  | 5.38                 | 0.06              | 0.06                | 0.13               |
| 3       | 1.38                   | 0.95                  | 2.32                 | 0.46              | 0.89                | 1.35               |
| 3       | 0.47                   | 0.31                  | 0.78                 | 0.31              | 0.27                | 0.58               |
| 3       | 0                      | 0                     | 0                    | 3.24              | 1.7                 | 4.93               |
| 3       | 0                      | 0                     | 0                    | 3.13              | 3.59                | 6.72               |

N.B. 1=Farm field; 2=Mixed forest ; 3= peri-domestic
